# Supplementary material for: Low-frequency inductive features in the electrochemical impedance spectra of mass-transport limited redox reactions
Source: Royal Society of Chemistry journal article supplement (doi:10.1039/d3cp00047h), 2023-01-01
Supplement: d3cp00047h1.pdf [file d3cp00047h1.pdf]

## Low-frequency inductive features in the electrochemical impedance spectra of mass-transport limited redox reactions

Debittree Choudhury, Rubul Das, Rajan Maurya, Geetanksha Gupta and Manoj Neergat\*

Department of Energy Science and Engineering

Indian Institute of Technology Bombay, Powai, Mumbai, 400076, India

For any Faradaic reaction associated with the one-adsorbate system, the net rate of production/consumption of electrons ( $r_0$ ) and the rate of production of the adsorbed species ( $r_1$ ) are given by equations **S1** and **S2** [1, 2].

$$r_0 = \frac{i}{F} \quad (\text{S1})$$

$$r_1 = \frac{q}{F} \left( \frac{d\theta}{dt} \right) \quad (\text{S2})$$

Here,  $q$  is the charge required for complete coverage, and other symbols have their usual meanings. The faradaic admittance of the system,  $\hat{Y}_f$ , is therefore presented in equation **S3**.

$$\hat{Y}_f = \frac{\tilde{i}}{\tilde{\eta}} = A + \frac{B}{j\omega + C} \quad (\text{S3})$$

The factors  $A$ ,  $B$ , and  $C$  are given by equations **S4**, **S5**, and **S6**.

$$A = -F \left( \frac{\partial r_0}{\partial \eta} \right)_\theta \quad (\text{S4})$$

$$B = -\frac{F^2}{q} \left( \frac{\partial r_0}{\partial \theta} \right)_\eta \left( \frac{\partial r_1}{\partial \eta} \right)_\theta \quad (\text{S5})$$

$$C = -\frac{F}{q} \left( \frac{\partial r_1}{\partial \theta} \right)_\eta \quad (\text{S6})$$

The behaviour of the system (capacitive/inductive) is decided by the factor  $B$ . Generally, if  $B > 0$ , the system behaviour is inductive, and the total impedance is given by equation **S7** [1, 2].

$$\hat{Z}_f = \frac{1}{\frac{1}{R_{ct}} + \frac{1}{j\omega L + R_0}} \quad (\text{S7})$$

Here  $R_{ct}$  is the charge-transfer resistance,  $L$  is the inductance and  $R_0$  serves as the inductive resistance, generally used to modify the phase delay between the voltage perturbation and the current response.

## EI analysis of MOR

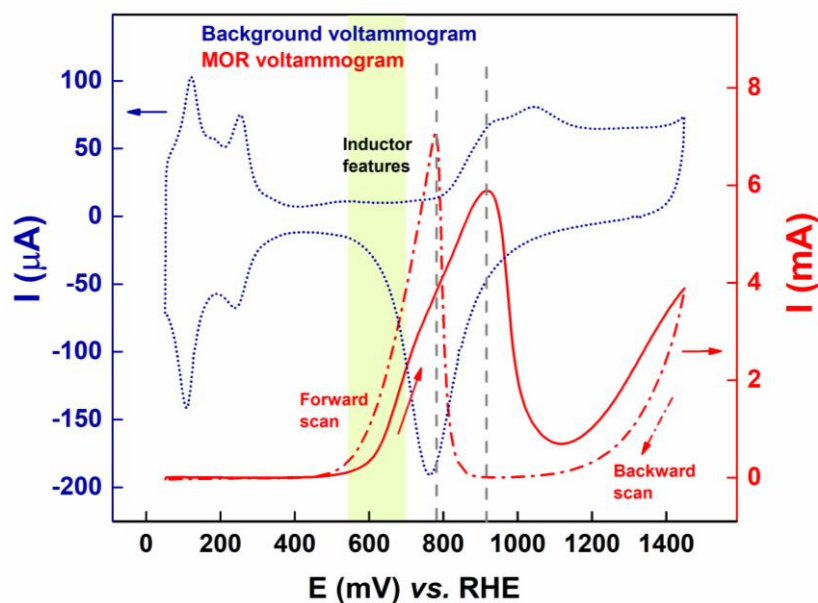

**Figure S1** The voltammogram of methanol oxidation reaction (red trace) on Pt black in 0.25 M MeOH (0.5 M H<sub>2</sub>SO<sub>4</sub>). Solid and dotted lines correspond to forward and backward scan, respectively. The blue trace shows the background voltammogram of Pt black in methanol-free 0.5 M H<sub>2</sub>SO<sub>4</sub>.

**Figure S1** presents the methanol oxidation voltammogram (red trace) in 0.5 M H<sub>2</sub>SO<sub>4</sub> (0.25 M MeOH) and the background voltammogram (blue trace) in the supporting electrolyte on Pt black. The voltammogram of Pt shows typical polycrystalline features, *i.e.*, hydrogen underpotential deposition (H<sub>upd</sub>) region (50–350 mV), double-layer region (400–600 mV), and oxide formation/reduction region (600–1100 mV). In the H<sub>upd</sub> region, H atoms adsorb/desorb on Pt surface, featuring sharp H<sub>upd</sub> peaks at 125 mV and 270 mV corresponding to Pt (110) and Pt (100) step sites, respectively [3, 4]. In the double-layer region, no charge-transfer occurs. From 600 mV onwards, surface oxidation starts and the oxides get reduced in the reverse scan.

The first peak appears at ~900 mV in the MOR voltammogram, suggesting the increasing methanol oxidation current with overpotential. The details of the reactions up to potential ~900 mV in the forward scan of the MOR voltammogram are explained in the main manuscript. The decrease in the oxidation current at potential above ~900 mV suggests extensive surface oxidation that inhibits the methanol oxidation. This is evident from the background CV as well (blue trace). At higher potentials, methanol present in the electrolyte

starts oxidizing again at ~1200 mV; here the oxygen source is assumed to be the oxide itself [5].

In the backward scan, once the surface oxide starts to reduce at potential down to ~850 mV (see the background CV in Figure S1), pristine Pt surface is obtained and the sites are available for methanol oxidation. Here, the simultaneous methanol dehydrogenation and oxidative removal of  $CO_{ad}$  causes a sharp increase in the current. But with decreasing potential in the reverse scan, the current due to methanol dehydrogenation and the  $OH_{ad}$  formation decreases exponentially. The oxidation peak of methanol appears at comparatively lower potential (~800 mV) in the reverse scan because the surface is free from any competing oxygenated species for adsorption, and a hysteresis is observed.

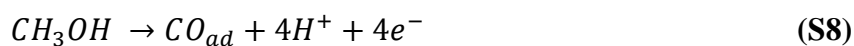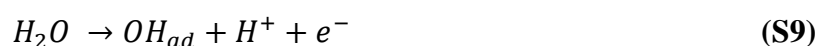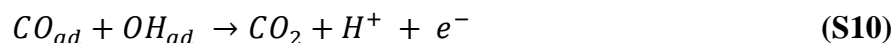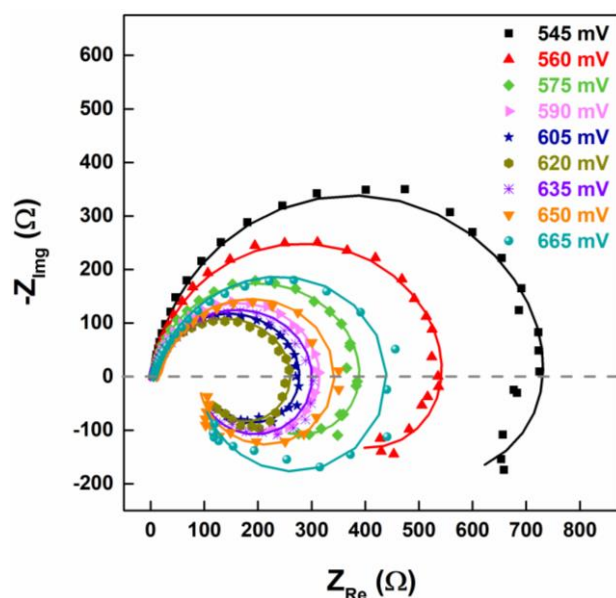

**Figure S2** Nyquist plots of MOR on Pt black in argon-saturated 0.25 M MeOH (in 0.5 M  $H_2SO_4$  electrolyte) at a potential interval of 15 mV.

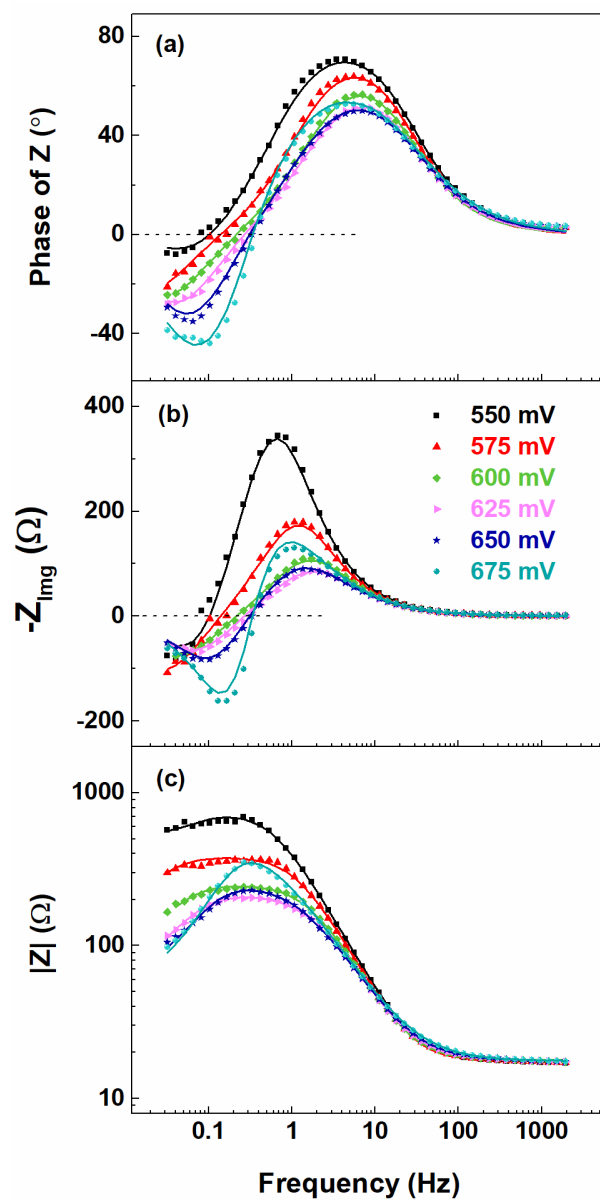

**Figure S3** (a) Phase, (b) imaginary, and (c) magnitude Bode plots of MOR on Pt black in 0.25 M MeOH (0.5 M H<sub>2</sub>SO<sub>4</sub>).

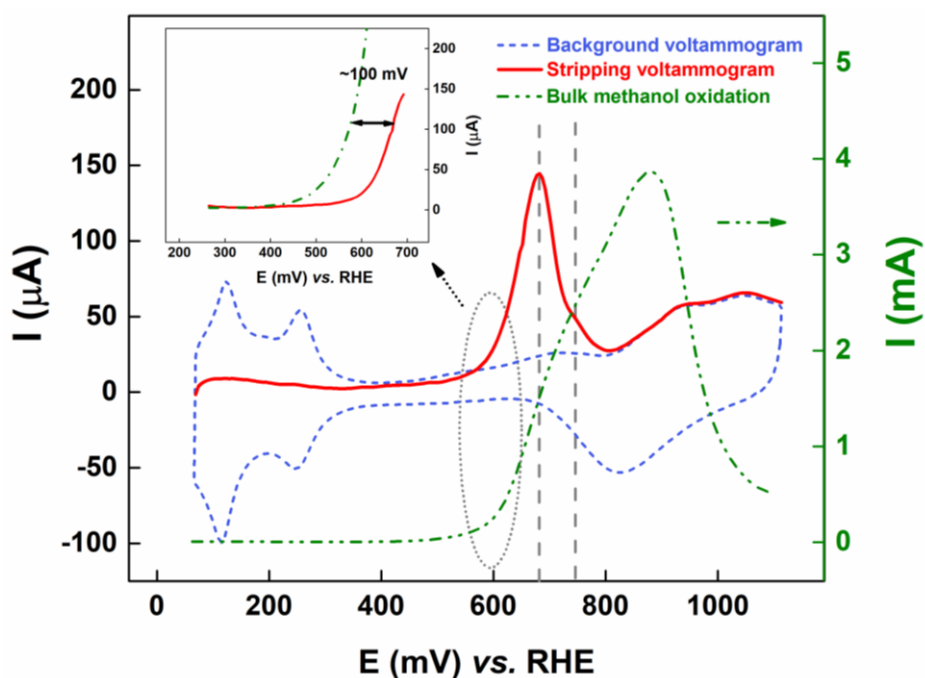

**Figure S4** Methanol stripping voltammogram (red trace) on Pt black in a 0.5 M  $\text{H}_2\text{SO}_4$  solution. The blue trace shows the background voltammogram. The green trace shows the bulk methanol oxidation voltammogram in the forward scan.

During the stripping experiment, a sharp oxidation peak is observed at  $\sim 700$  mV in the first forward scan. In the second forward scan, the CO oxidation peak does not appear, and clean  $\text{H}_{\text{upd}}$  is obtained, indicating complete stripping of adsorbed CO ( $\text{CO}_{\text{ad}}$ ) during the first forward scan [6, 7]. Both scans are presented in the **Figure S4**.

The onset of methanol dehydrogenation starts at  $\sim 450$  mV, which is  $\sim 100$  mV down to the onset potential of CO oxidation during the stripping (see inset to Figure S4). The sharp oxidation peak in the stripping voltammogram (red trace) (at  $\sim 700$  mV) nearly matches with the shoulder peak in the bulk methanol oxidation CV in a methanol-containing electrolyte (green trace). Thereafter, the current increases at potential above  $\sim 700$  mV due to the oxidative removal of  $\text{CO}_{\text{ad}}$  by the  $\text{OH}_{\text{ad}}$  during MOR. The shoulder peak at  $\sim 750$  mV in the stripping voltammogram is possibly due to the oxidation of CO at different orientation of Pt [8]. From  $\sim 900$  mV onwards, the current starts decreasing in the MOR voltammogram due to high surface coverage by the oxygenated species, as evident from the background voltammogram.

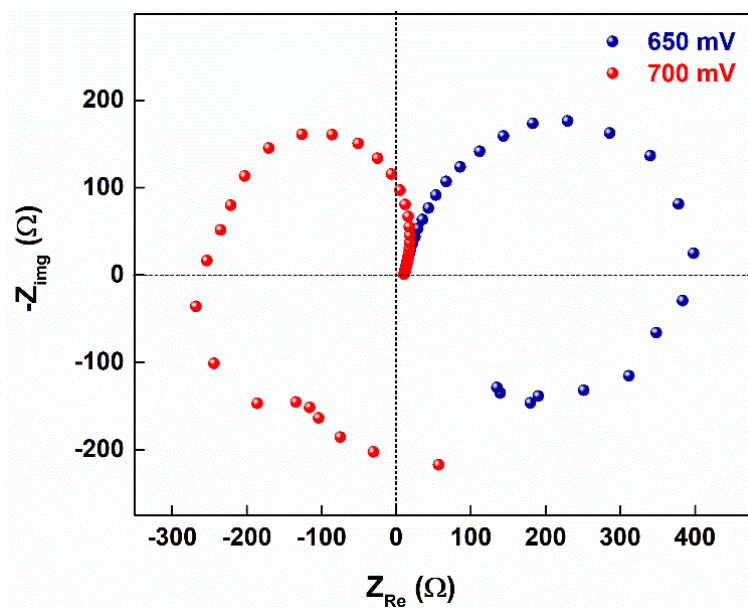

**Figure S5** Nyquist plots of MOR in two different potential regions. Red trace features the change in  $r_{ds}$  from CO oxidation to excessive formation of surface  $\text{OH}_{\text{ad}}$ .

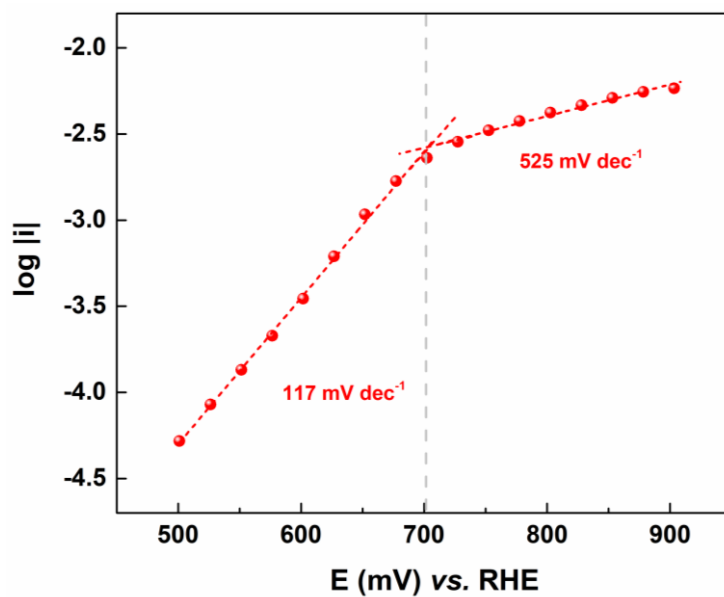

**Figure S6** Tafel plot of MOR recorded in 0.25 M MeOH (0.5 M  $\text{H}_2\text{SO}_4$ ).

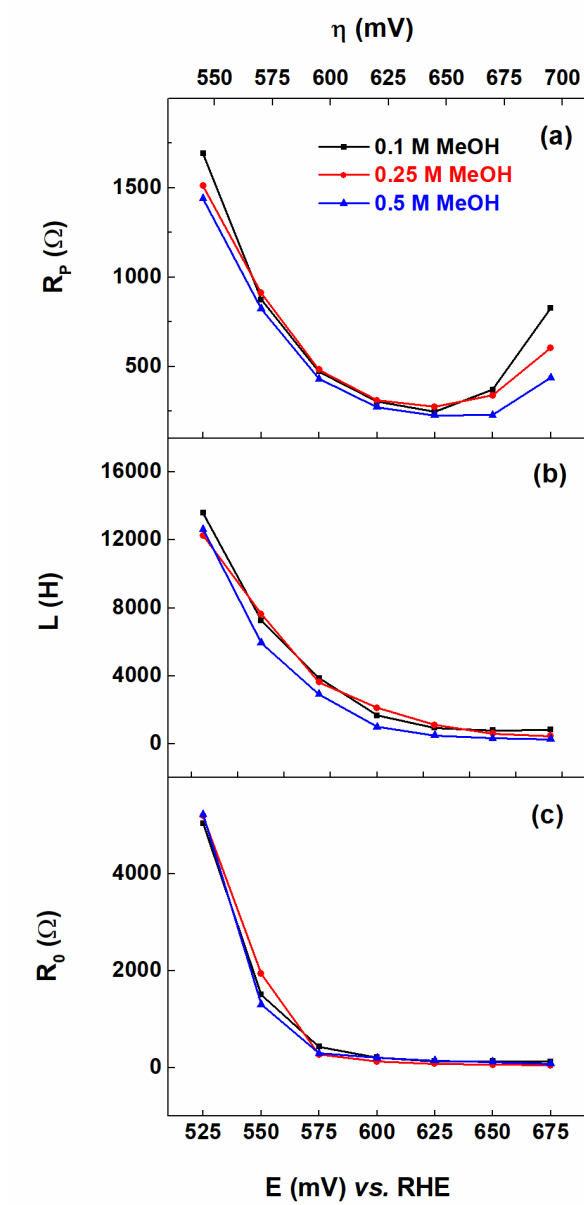

**Figure S7** Trends in (a)  $R_p$ , (b)  $L$ , and (c)  $R_0$  of MOR at different MeOH concentrations on Pt black.

**Table S1** Trend in the values of  $R_p$ ,  $L$  and  $R_0$  with potential for methanol oxidation reaction on Pt black (loading:  $125 \mu\text{g cm}^{-2}$ ) in  $0.5 \text{ M H}_2\text{SO}_4$  ( $0.25 \text{ M MeOH}$ )

| <b>E (mV)</b> | <b><math>R_p</math> (<math>\Omega</math>)</b> | <b>L (H)</b>     | <b><math>R_0</math> (<math>\Omega</math>)</b> |
|---------------|-----------------------------------------------|------------------|-----------------------------------------------|
| <b>525</b>    | $1358 \pm 44$                                 | $15583 \pm 1840$ | $4104 \pm 440$                                |
| <b>550</b>    | $683 \pm 31$                                  | $7707 \pm 1552$  | $1464 \pm 142$                                |
| <b>575</b>    | $384 \pm 10$                                  | $2786 \pm 204$   | $365 \pm 19$                                  |
| <b>600</b>    | $249 \pm 11$                                  | $1237 \pm 39$    | $151 \pm 12$                                  |
| <b>625</b>    | $210 \pm 9$                                   | $653 \pm 23$     | $101 \pm 7$                                   |
| <b>650</b>    | $259 \pm 63$                                  | $431 \pm 17$     | $83 \pm 8$                                    |
| <b>675</b>    | $413 \pm 46$                                  | $332 \pm 14$     | $66 \pm 7$                                    |

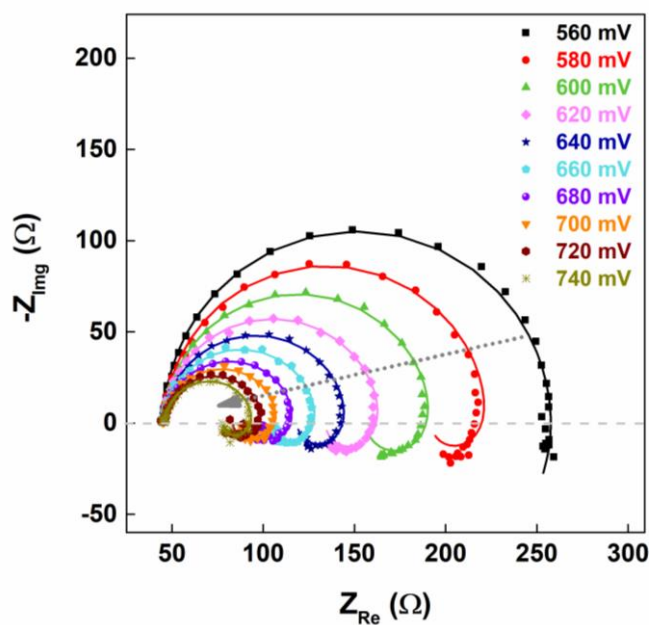

**Figure S8** Nyquist plots of MOR on Pt black in argon-saturated  $0.25 \text{ M MeOH}$  (in  $0.1 \text{ M NaOH}$  electrolyte).

The mechanism of MOR in the alkaline medium is the following [9].



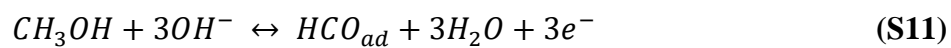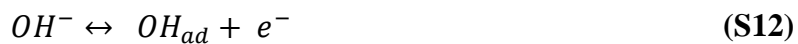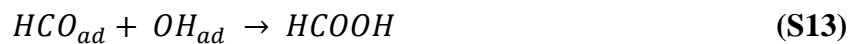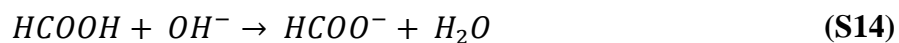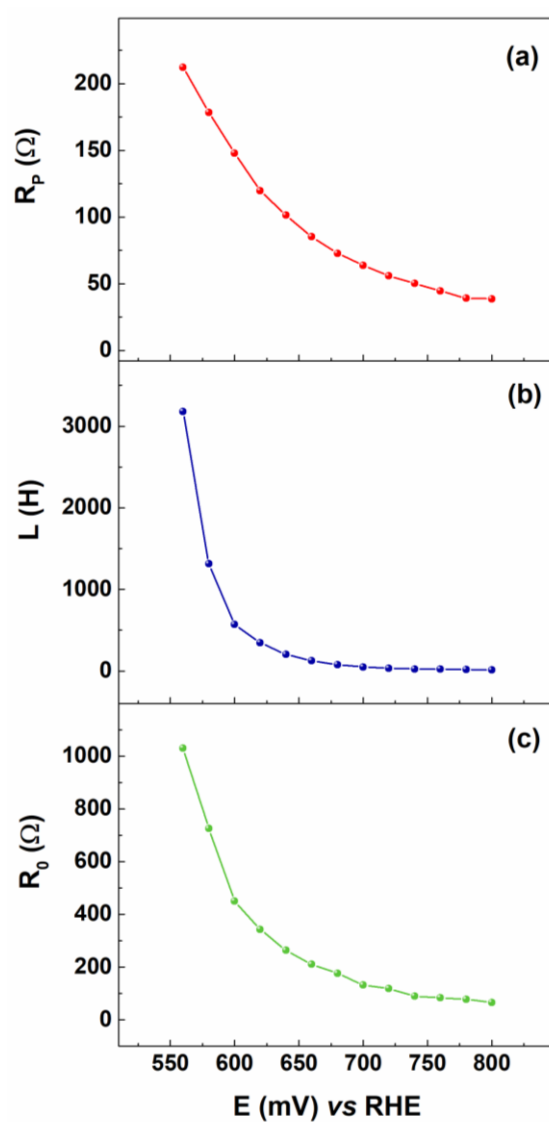

**Figure S9** Trend in (a)  $R_p$ , (b)  $L$ , and (c)  $R_0$  values with potential for MOR on Pt black in 0.25 M MeOH (0.1 M NaOH) electrolyte.

## EI analysis of ORR

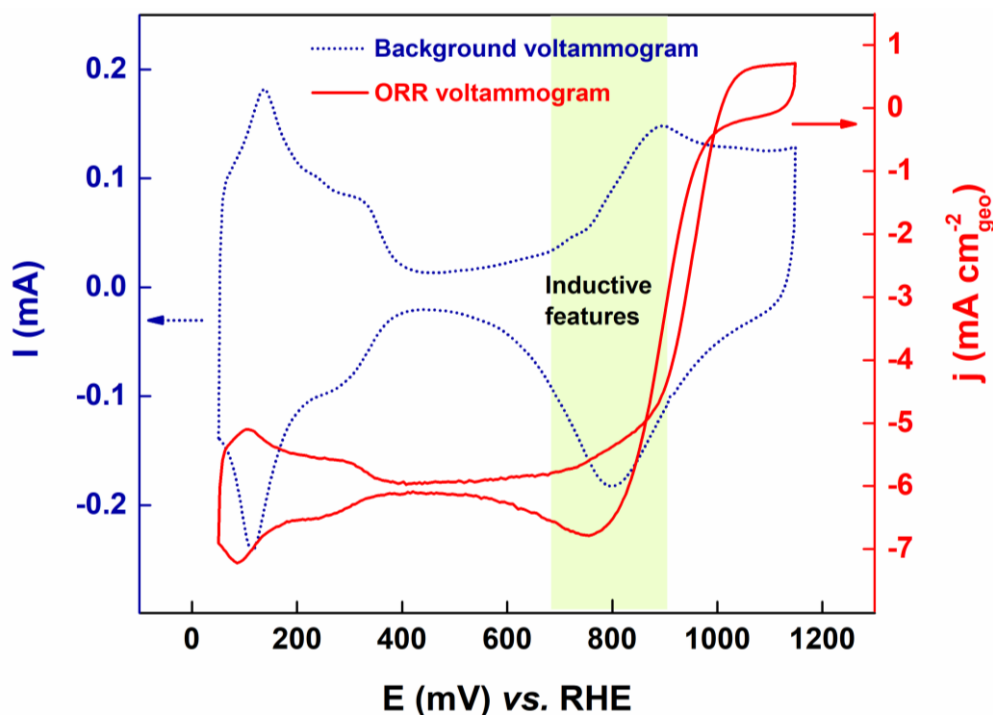

**Figure S10** Background voltammogram (blue trace) and ORR polarization curve (red trace) of Pt black (loading:  $125 \mu\text{g cm}^{-2}$ ) in argon-saturated and oxygen-saturated 0.1 M  $\text{HClO}_4$ , respectively.

**Figure S10** presents the ORR voltammogram on Pt black (red trace) in oxygen-saturated 0.1 M  $\text{HClO}_4$  along with the corresponding background voltammogram (blue trace) in argon-saturated 0.1 M  $\text{HClO}_4$ . The voltammogram shows Pt polycrystalline features as discussed earlier. From 600 mV onwards, various surface oxygenated species start forming [10, 11].

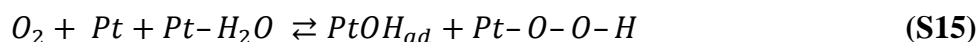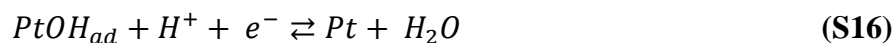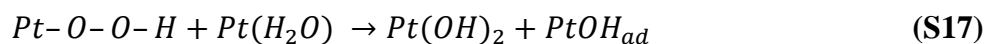

The red trace in Figure S10 presents the ORR voltammogram on Pt black electrode in oxygen-saturated 0.1 M  $\text{HClO}_4$ . A hysteresis between the forward and backward scans is observed in the ORR voltammogram. During the forward scan (positive scan direction),

pristine Pt surface is available for ORR. While in the backward scan (negative scan direction), the surface oxide formed at higher potentials blocks the active sites, and hence ORR occurs on Pt surface partially covered with oxygenated species, which eventually lowers the kinetic current and causes a hysteresis. The ORR curve has three regions, that is, kinetic limited region (1050–950 mV), mixed kinetic diffusion-controlled region (900–800 mV) and mass-transfer limited region (800 mV onwards).

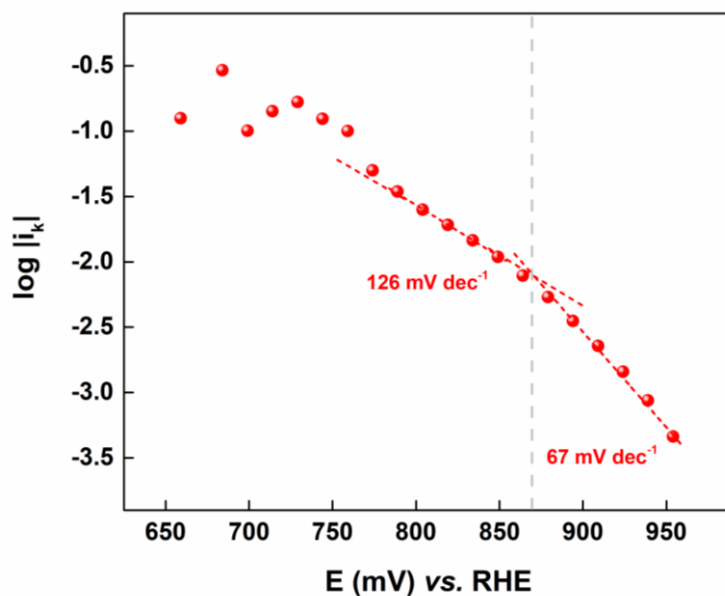

**Figure S11** Tafel slope of ORR in oxygen-saturated 0.1 M HClO<sub>4</sub>.

The Tafel plot of ORR is presented as  $\log i_k$  vs.  $E$  in **Figure S11**. The total current is corrected for the limiting current using Koutecky-Levich equation as follows [12].

$$\frac{1}{i} = \frac{1}{i_k} + \frac{1}{i_l} \quad (\text{S18})$$

Here,  $i$  is the total current,  $i_k$  the kinetic current, and  $i_l$  is the limiting current.

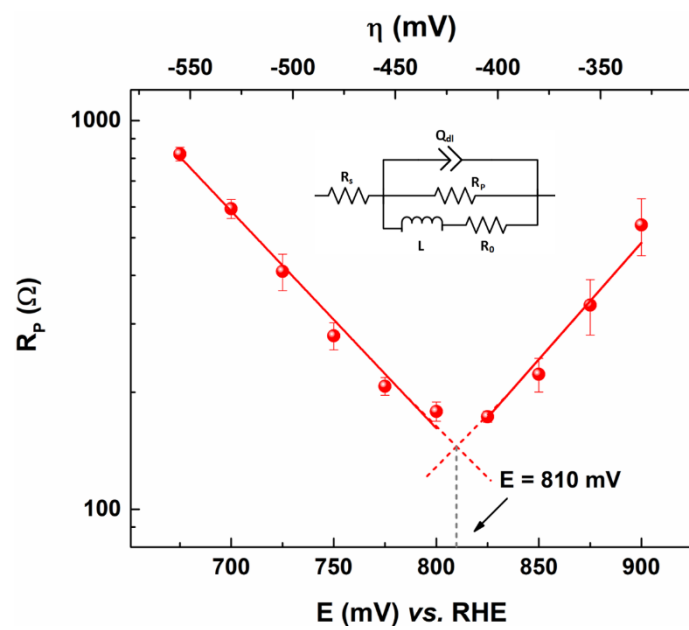

**Figure S12** Trend in  $R_p$  values for ORR on Pt black in 0.1 M HClO<sub>4</sub>. Inset shows the equivalent circuit used to fit the experimental data.

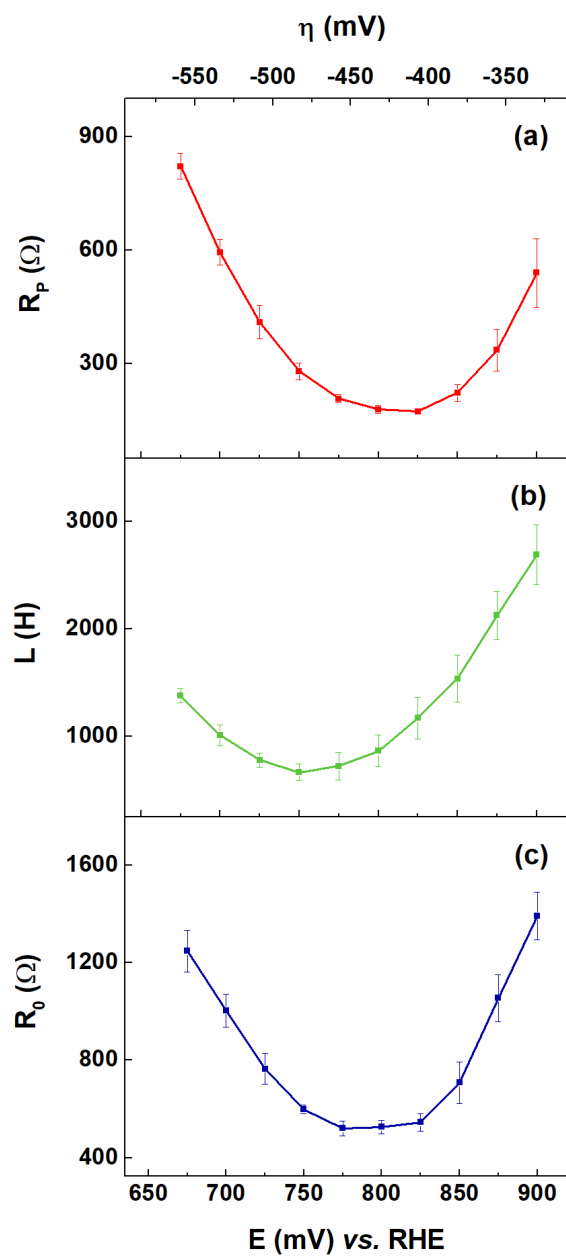

**Figure S13** The trend in (a)  $R_p$ , (b)  $L$ , and (c)  $R_0$  values as functions of potential for complete ORR region.

**Table S2** Trend in the values of  $R_p$ ,  $L$ , and  $R_0$  with potential for ORR on Pt black (loading:  $125 \mu\text{g cm}^{-2}$ ) in 0.1 M  $\text{HClO}_4$

| <b>E (mV)</b> | <b><math>R_p</math> (<math>\Omega</math>)</b> | <b>L (H)</b>   | <b><math>R_0</math> (<math>\Omega</math>)</b> |
|---------------|-----------------------------------------------|----------------|-----------------------------------------------|
| <b>900</b>    | 540 $\pm$ 80                                  | 2691 $\pm$ 280 | 1392 $\pm$ 97                                 |
| <b>875</b>    | 335 $\pm$ 52                                  | 2125 $\pm$ 226 | 1054 $\pm$ 96                                 |
| <b>850</b>    | 223 $\pm$ 22                                  | 1537 $\pm$ 217 | 708 $\pm$ 84                                  |
| <b>825</b>    | 173 $\pm$ 5                                   | 1171 $\pm$ 194 | 545 $\pm$ 36                                  |
| <b>800</b>    | 178 $\pm$ 10                                  | 863 $\pm$ 147  | 526 $\pm$ 48                                  |
| <b>775</b>    | 207 $\pm$ 10                                  | 721 $\pm$ 128  | 520 $\pm$ 50                                  |
| <b>750</b>    | 280 $\pm$ 22                                  | 663 $\pm$ 80   | 597 $\pm$ 17                                  |
| <b>725</b>    | 409 $\pm$ 40                                  | 779 $\pm$ 66   | 764 $\pm$ 63                                  |
| <b>700</b>    | 594 $\pm$ 32                                  | 1011 $\pm$ 96  | 1004 $\pm$ 68                                 |
| <b>675</b>    | 821 $\pm$ 33                                  | 1377 $\pm$ 66  | 1248 $\pm$ 85                                 |

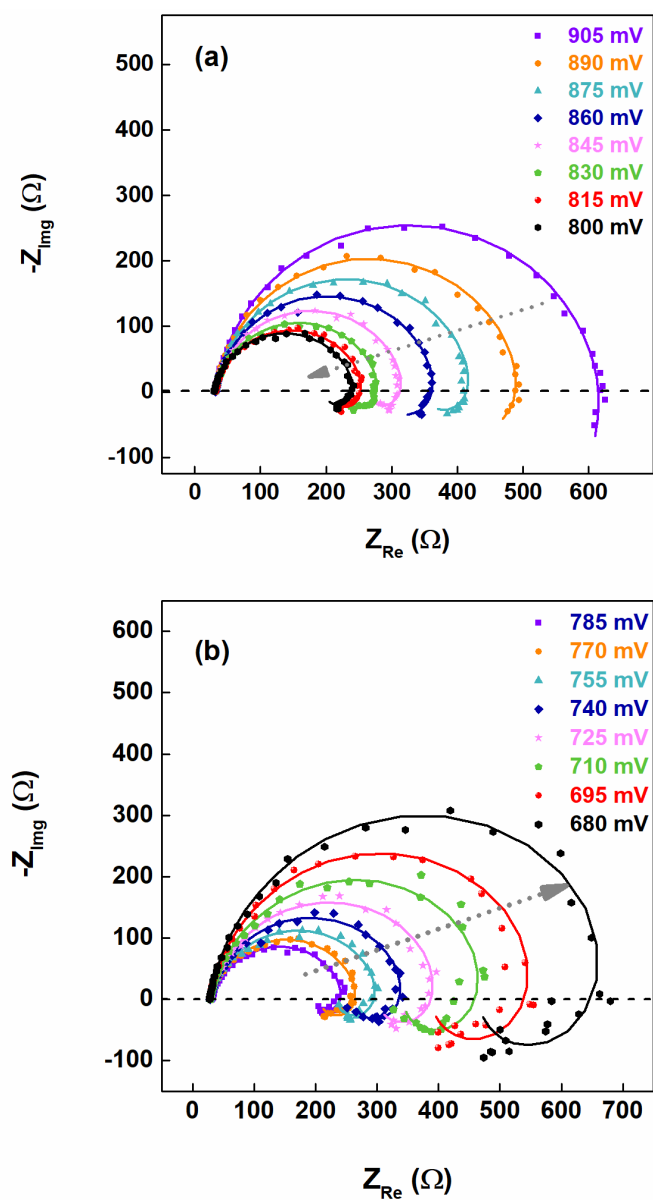

**Figure S14** Nyquist plots of ORR in oxygen-saturated 0.1 M  $HClO_4$  in the (a) mixed kinetic-diffusion-controlled, and (b) mass-transport limited regions at a potential interval of 15 mV.

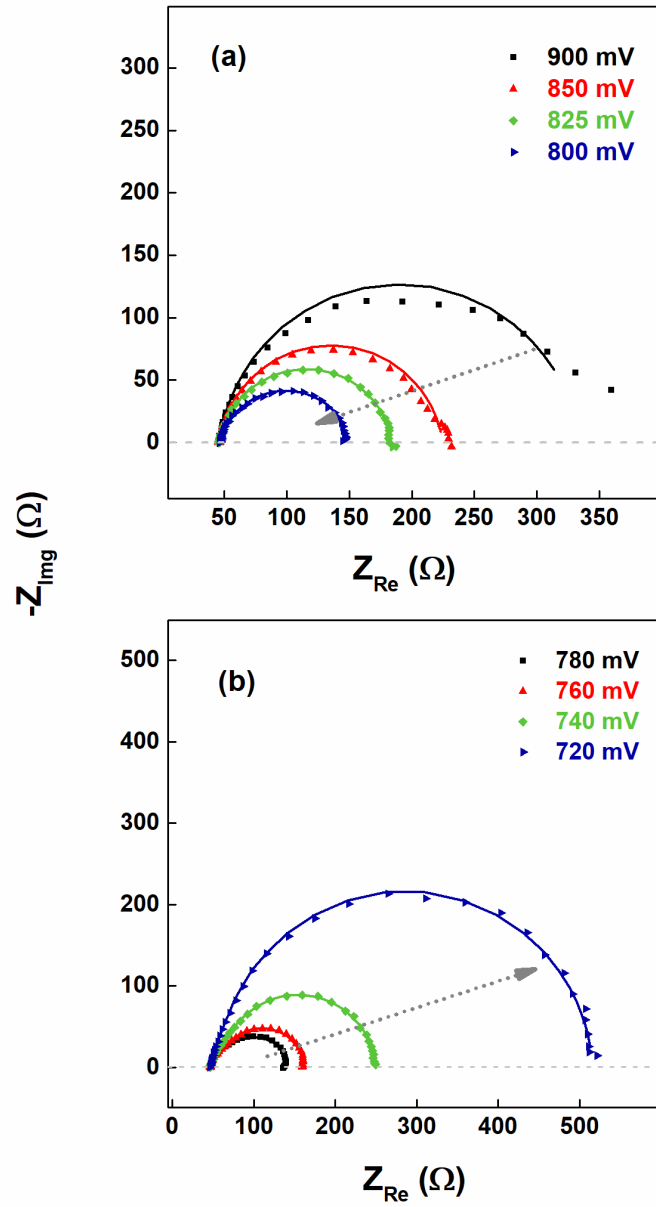

**Figure S15** Nyquist plots of ORR on Pt black in oxygen-saturated 0.1 M NaOH in the (a) mixed kinetic-diffusion-controlled, and (b) mass-transport limited regions.

The mechanism of ORR in alkaline medium is the following [13].

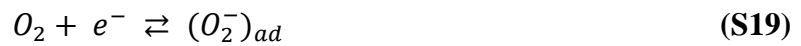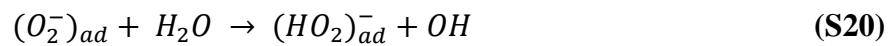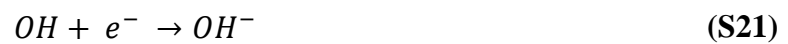



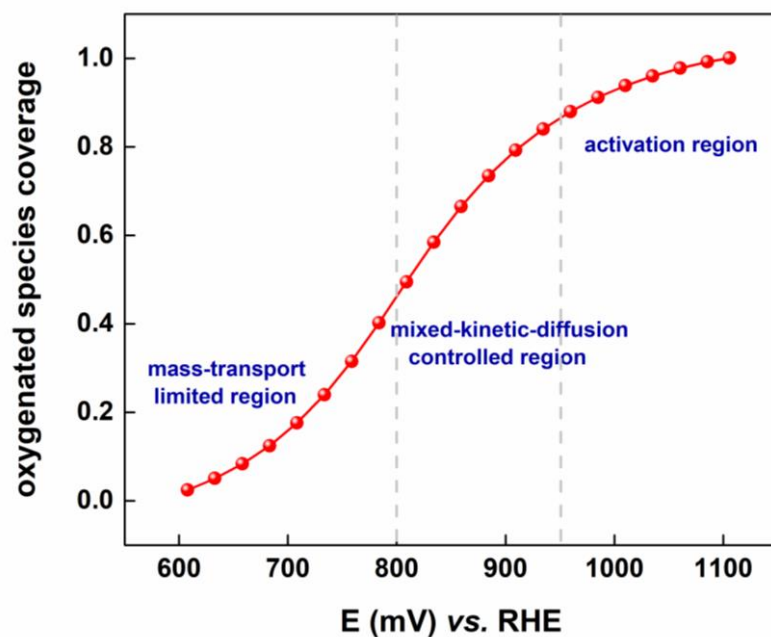

**Figure S16** Adsorption isotherm at room temperature (298 K) for oxygen reduction on Pt black in oxygen-saturated 0.1 M HClO<sub>4</sub>.

**Figure S16** presents the adsorption isotherm, obtained from the background voltammogram of Pt black in 0.1 M HClO<sub>4</sub> (Figure S10). The charge from the oxide reduction peak is integrated from 1100 mV to 600 mV to obtain the change in oxygenated species coverage with potential in the experimental potential range of ORR. The oxygenated species coverage is taken as 1 at 1100 mV, the starting potential of ORR in this work and the relative decrease in coverage with potential is calculated from the charge integrated at each potential.

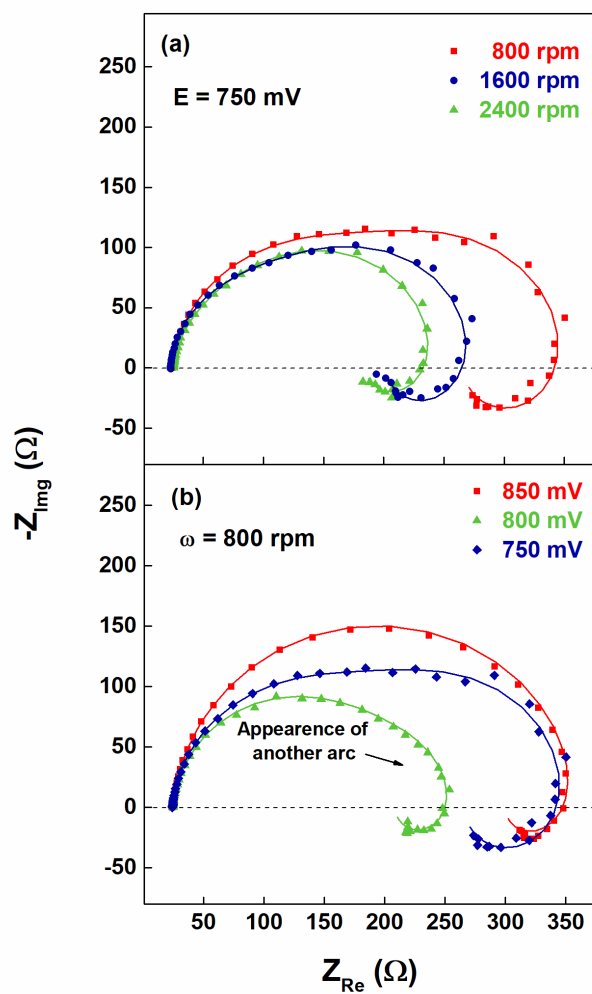

**Figure S17** Nyquist plots of ORR on Pt black in oxygen-saturated 0.1 M  $\text{HClO}_4$  at (a) a constant potential of 750 mV, and at rotation rate from 800 to 2400 rpm, and (b) constant rotation of 800 rpm, and varying the potential in the mass-transport limited region.

**Table S3** Trend in the values of  $L$  and  $R_0$  with rotation rate for ORR on Pt black (loading:  $125 \mu\text{g cm}^{-2}$ ) in  $0.1 \text{ M HClO}_4$  at  $750 \text{ mV}$

| $\omega$ (rpm) | $L$ (H) | $R_0$ ( $\Omega$ ) |
|----------------|---------|--------------------|
| 800            | 1212    | 851.3              |
| 1600           | 431.2   | 582.9              |
| 2400           | 349.3   | 528.2              |

**Table S4** Trend in the values of  $L$  and  $R_0$  with rotation rate for ORR on Pt black (loading:  $125 \mu\text{g cm}^{-2}$ ) in  $0.1 \text{ M HClO}_4$  at a rotation rate of  $800 \text{ rpm}$

| $E$ (mV) | $L$ (H) | $R_0$ ( $\Omega$ ) |
|----------|---------|--------------------|
| 850      | 1560    | 1325               |
| 800      | 1028    | 844                |
| 750      | 1212    | 852                |

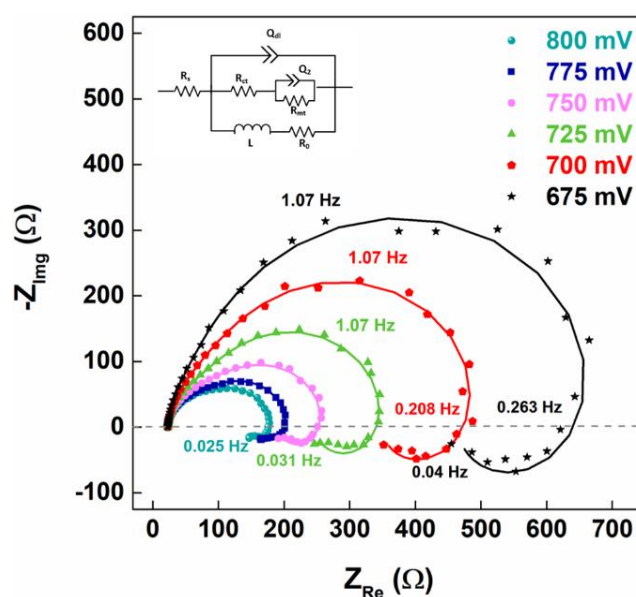

**Figure S18** Nyquist plots for ORR on Pt black in  $0.1 \text{ M HClO}_4$  in the mass-transport limited region. Inset shows the equivalent circuit used to fit the experimental data.

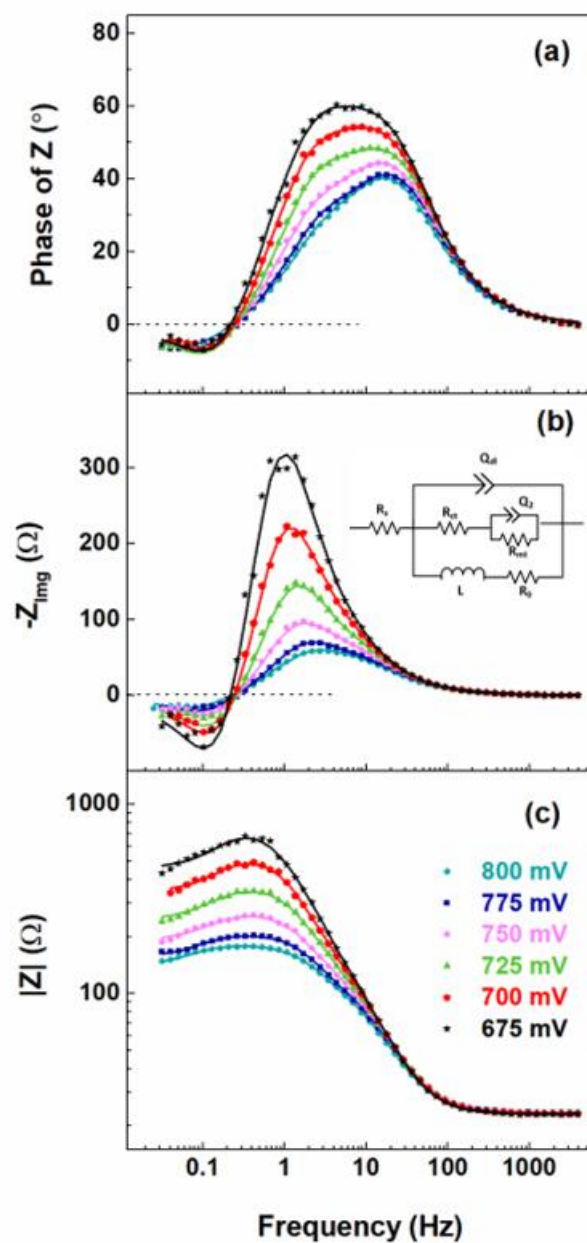

**Figure S19** Phase (a), imaginary (b), and magnitude (c) Bode plots of ORR in oxygen-saturated 0.1 M HClO<sub>4</sub> in the mass-transport limited region. Inset shows the equivalent circuit used to fit the experimental data.

**Table S5** Trend in the values of  $R_{ct}$ ,  $R_{mt}$ ,  $L$ , and  $R_0$  with potential for ORR on Pt black (loading:  $125 \mu\text{g cm}^{-2}$ ) in oxygen-saturated  $0.1 \text{ M HClO}_4$ . The data is fitted with the circuit 2 presented in main manuscript.

| E (mV) | $R_{ct}$ ( $\Omega$ ) | $R_{mt}$ ( $\Omega$ ) | L (H)          | $R_0$ ( $\Omega$ ) |
|--------|-----------------------|-----------------------|----------------|--------------------|
| 800    | $131 \pm 12$          | $47 \pm 3$            | $901 \pm 140$  | $515 \pm 26$       |
| 775    | $134 \pm 13$          | $68 \pm 3$            | $763 \pm 45$   | $536 \pm 26$       |
| 750    | $150 \pm 11$          | $119 \pm 5$           | $851 \pm 32$   | $619 \pm 33$       |
| 725    | $188 \pm 22$          | $209 \pm 18$          | $1010 \pm 37$  | $811 \pm 32$       |
| 700    | $238 \pm 23$          | $348 \pm 70$          | $1280 \pm 108$ | $1007 \pm 64$      |
| 675    | $314 \pm 27$          | $489 \pm 40$          | $1598 \pm 67$  | $1415 \pm 88$      |

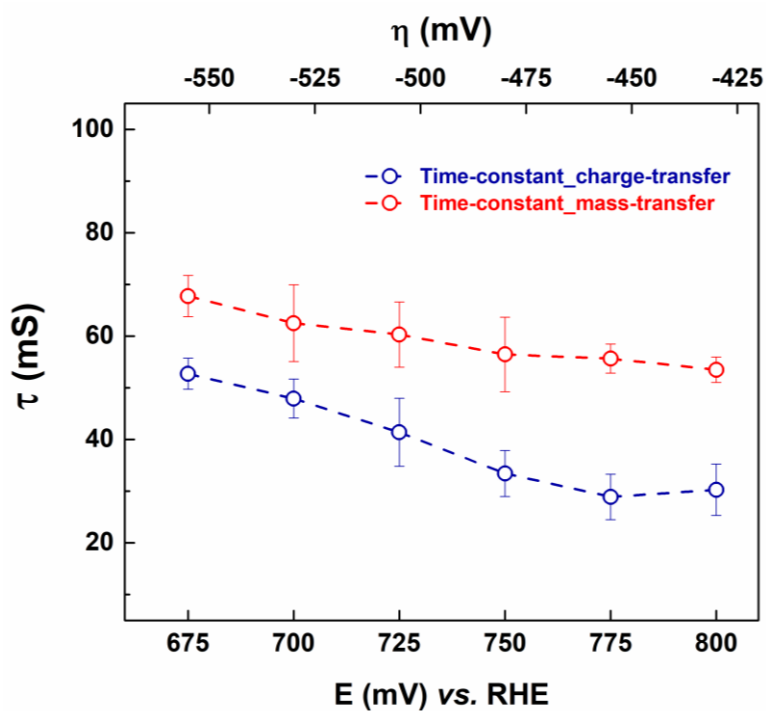

**Figure S20** The variation of the time-constants associated to charge-transfer and mass-transfer processes in the mass-transport limited region as function of potential.

$$\tau = R \times C \quad (\text{S22})$$

**Table S6** Parameters obtained by fitting the EIS pattern of ORR recorded at 800 mV ( $\omega = 1600$  rpm) in 0.1 M HClO<sub>4</sub> solution. The EC presented in Figure 1 (Circuit 1) is used for fitting the data.

| Parameter                             | Obtained fitting value | Relative standard error (%) | $\chi^2$ value | Relative error of the measured impedance |
|---------------------------------------|------------------------|-----------------------------|----------------|------------------------------------------|
| R <sub>s</sub>                        | 22.7                   | 1.00                        | 0.00166        | 3.036                                    |
| R <sub>P</sub>                        | 254.6                  | 2.18                        |                |                                          |
| Q <sub>1</sub> (S. sec <sup>φ</sup> ) | 0.0002549              | 4.41                        |                |                                          |
| Φ <sub>1</sub>                        | 0.8195                 | 1.16                        |                |                                          |
| L                                     | 860.6                  | 11.00                       |                |                                          |
| R <sub>0</sub>                        | 509.8                  | 7.18                        |                |                                          |

**Table S7** Parameters obtained by fitting the EIS pattern of ORR recorded at 800 mV ( $\omega = 1600$  rpm) in 0.1 M HClO<sub>4</sub> solution. The EC presented in Figure 2 (Circuit 2) is used for fitting the data.

| Parameter                             | Obtained fitting value | Relative standard error (%) | $\chi^2$ value | Relative error of the measured impedance |
|---------------------------------------|------------------------|-----------------------------|----------------|------------------------------------------|
| R <sub>s</sub>                        | 23.28                  | 0.44                        | 0.000215       | 1.566                                    |
| R <sub>ct</sub>                       | 135                    | 4.41                        |                |                                          |
| Q <sub>1</sub> (S. sec <sup>φ</sup> ) | 0.0002327              | 4.48                        |                |                                          |
| Φ <sub>1</sub>                        | 0.93                   | 1.17                        |                |                                          |
| R <sub>mt</sub>                       | 111.2                  | 6.26                        |                |                                          |
| Q <sub>2</sub> (S. sec <sup>φ</sup> ) | 0.0006361              | 5.36                        |                |                                          |
| Φ <sub>2</sub>                        | 0.99                   | 4.68                        |                |                                          |
| L                                     | 893.7                  | 7.30                        |                |                                          |
| R <sub>0</sub>                        | 578.5                  | 3.48                        |                |                                          |

The EIS pattern recorded at 800 mV (onset of mass-transport) is fitted with both the circuits presented in Figures 1 and 2. The F-test help justifying the use of the latter circuit over the former statistically.

Number of degrees of freedom  $\nu = 2N - m$

$N$  is the number of frequencies ( $2N$  is used because  $2N$  measured impedance values;  $N$  real and  $N$  imaginary), and  $m$  is the number of adjustable parameters in the model.

$N = 55, m = 6$

$k$  is the number of parameters added in the new model.

$k = 3, \alpha = 0.05$

$F(\alpha, k, 2N - m - k) = 2.6928$  (calculated in excel using F.INV.RT)

$$F_{exp} = \frac{\frac{S_1 - S_2}{(2N - m) - (2N - m - k)}}{\frac{S_2}{(2N - m - k)}} = \frac{S_1 - S_2}{S_2} \times \frac{(2N - m - k)}{k}$$

$S_1 = 3.036, S_2 = 1.566$

Therefore,  $F_{exp} = 48.36$

$F_{exp} > F(\alpha, k, 2N - m - k)$

Hence, the circuit containing the mass-transfer element (Circuit 2) is better acceptable.

## References

1. D. A. Harrington and B. E. Conway, *Electrochim. Acta*, 1987, **32**, 1703–1712.
2. A. Lasia, *Electrochemical Impedance Spectroscopy and its Applications*; Springer: New York, 2014.
3. R. Devivaraprasad, R. Ramesh, N. Naresh, T. Kar, R. K. Singh, and M. Neergat, *Langmuir*, 2014, **30**, 8995–9006.
4. J. Solla-Gullon, F. J. Vidal-Iglesias, A. Lopez-Cudero, E. Garnier, J. M. Feliu, and A. Aldaz, *Phys. Chem. Chem. Phys.*, 2008, **10**, 3689–3698.
5. F. Seland, R. Tunold and D. A. Harrington, *Electrochim. Acta*, 2006, **51**, 3827–3840.
6. Y. Zhou, Y. Kuang, G. Hu, X. Wang, and L. Feng, *Mater. Today Phys.*, 2022, **27**, 100831.
7. Y. Zhou, Q. Wang, X. Tian, and L. Feng, *Nano Res.*, 2022, **15**, 8936–8945.
8. A. Cuesta, A. Couto, A. Rincon, M.C. Pérez, A. Lopez-Cudero, C. Gutierrez, *J. Electroanal. Chem.*, 2006, **586**, 184–195.
9. A. V. Tripkovic, K. D. Popovic, J. D. Lovic, V. M. Jovanovic, A. Kowal, *J. Electroanal. Chem.*, 2004, **572**, 119–128.
10. A. Damjanovic and V. Brusic, *Electrochim. Acta*, 1967, **12**, 615–628.
11. D. B. Sepa, M. V. Voinovic and A. Damjanovic, *Electrochim. Acta*, 1981, **26**, 781–793.
12. A. Bard and L. Faulkner, *Electrochemical Methods: Fundamentals and Applications*; pp 341, chapter 9, John Wiley and Sons: New York, 2001.
13. A. Damjanovic, M. A. Genshaw, and J. O'M. Bockris, *J. Electrochem. Soc.*, 1967, **114**, 1107–1112.
